# Supplementary material
Source: PubMed Central journal article supplement (PMC4375022)
Supplement: NIHMS652054-supplement-supplement_1.pdf [file NIHMS652054-supplement-supplement_1.pdf]

## Supplementary Information

### Reduced Levels of Hspa9 Attenuates Stat5 Activation in Mouse B-cells

Kilannin Krysiak,<sup>a,c</sup> Justin F. Tibbitts,<sup>a,c</sup> Jin Shao,<sup>a,c</sup> Tuoen Liu,<sup>a,c</sup> Matthew Ndonwi,<sup>a,c</sup> and  
Matthew J. Walter<sup>a,b,c,d</sup>

Department of Medicine<sup>a</sup>, Department of Genetics<sup>b</sup>, Division of Oncology<sup>c</sup>, Siteman Cancer  
Center<sup>d</sup>, Washington University School of Medicine, St. Louis, MO.

## SUPPLEMENTAL RESULTS

In this study we describe the effects of reduced *Hspa9* expression on murine hematopoiesis using a gene trap to disrupt *Hspa9*. We investigated the effect of the gene trap disruption of *Hspa9* on the expression of neighboring genes (*Ets1*, *Ctnna1*, and *Gm26109*). Microarray expression levels of *Ets1* and *Ctnna1* were not significantly different between *Hspa9*<sup>+/+</sup> and *Hspa9*<sup>+/-</sup> CFU-preB colony derived cells (N=3/genotype; *Ets1* 602±147 vs. 553±176; *Ctnna1* 205±19 vs. 214±41 arbitrary units) (*data not shown*). Two putative snoRNAs are predicted to reside within introns 10 (*Gm26109*) and 11 (*Gm22200*) of *Hspa9*. We were unable to detect expression of the putative snoRNA *Gm22200* in bulk bone marrow or B-cell fractions from wild-type mice by RT-PCR so it was not studied further. Gene trap insertion in *Hspa9*<sup>+/-</sup> mice does disrupt normal expression of the putative snoRNA, *Gm26109*, reducing its expression ~32% (N=3/genotype, *Hspa9*<sup>+/+</sup> 1±0.085 vs. *Hspa9*<sup>+/-</sup> 0.68±0.074 arbitrary units relative to a control *sno202*, p=0.008) (*data not shown*). shRNA-mediated knockdown of *Hspa9* did not affect *Gm26109* expression levels in YFP+ bone marrow cells (N=6-7/group, shLUC 1±0.3 vs. shHspa9 1.17±0.47 arbitrary units relative to a control *sno202*) (*data not shown*). *Gm26109* shares 83% identity with *SNORD63*, a human C/D box snoRNA of unknown functional significance located in intron 10 of human *HSPA9*. These results, in conjunction with the ability of *HSPA9* expression to rescue the reduction in B-cell colonies in *Hspa9*<sup>+/-</sup> mice (**Fig. S7B**), indicate that the reduction of *Hspa9*, not *Gm26109* levels, contributes to the B-cell phenotypes observed.

**SUPPLEMENTAL FIGURE LEGENDS****Figure S1: Hspa9 expression is reduced using an N-terminal Hspa9 antibody**

Expression of Hspa9 in bone marrow and spleen of littermates was evaluated by Western blot using an N-terminal antibody and  $\beta$ -Actin loading control.

**Figure S2: Organ cellularity, spleen size and CBCs are normal in *Hspa9*<sup>+/-</sup> mice**

*Hspa9*<sup>+/-</sup> (open circles) and *Hspa9*<sup>+/+</sup> (closed circles) littermates were evaluated at the ages indicated in months for **A**) total cellularity of bone marrow (*left panel*, 4 leg bones) and spleens (*right panel*), **B**) body (*left panel*) and spleen (*right panel*) weights, and **C**) complete blood counts from peripheral blood. No significant differences between genotypes were detected. PLT, platelets, *orange*; MCV, mean corpuscular volume, *green*; Hb, hemoglobin, *red*; WBC, white blood cells, *blue*.

**Figure S3: Immunophenotyping of peripheral blood and spleen cells up to 12 months of age**

**A**) Spleen cells of *Hspa9*<sup>+/-</sup> and *Hspa9*<sup>+/+</sup> littermates were analyzed by flow cytometry for immunophenotypic markers showing no difference between genotypes. Neutrophils ( $\text{Gr1}^+/\text{CD115}^-$ , *red bars*); B-cells ( $\text{B220}^+$ , *green bars*); monocytes ( $\text{Gr1}^{\text{lo}}/\text{CD115}^+$ , *orange bars*); T-cells ( $\text{CD3e}^+$ , *blue bars*) (N=3-6/genotype at each time point). **B**) The percent of red blood cell precursors ( $\text{CD71}^{\text{+/-}}/\text{Ter119}$ ) in spleen and peripheral blood cell populations of *Hspa9*<sup>+/-</sup> (*open circles*) and *Hspa9*<sup>+/+</sup> (*closed circles*) littermates at 12 months of age are not different. ProEBs, proerythroblasts; BasoEBs, basophilic erythroblasts; PolyEBs, polychromatic erythroblasts; OrthoEBs, orthochromatic erythroblasts. Error bars represent mean  $\pm$  SD.

**Figure S4: Colony forming ability of erythroid and myeloid spleen and bone marrow progenitors from *Hspa9*<sup>+/-</sup> and *Hspa9*<sup>+/+</sup> mice are similar**

Spleen cells from *Hspa9*<sup>+/-</sup> (*open circles*) and *Hspa9*<sup>+/+</sup> (*closed circles*) mice were plated in **A**) CFU-C media or **B**) mature BFU-E media (supplemented with only EPO) and colonies were enumerated on day 7 or 10, respectively. **C**) 10,000 bone marrow or 100,000 spleen cells from 12-month-old mice were plated in CFU-C media and BFU-E and CFU-E colonies were enumerated on day 7 and 3, respectively. BM, bone marrow; Spl, spleen

**Figure S5: *Hspa9*<sup>+/-</sup> and *Hspa9*<sup>+/+</sup> littermate mice respond similarly to hematopoietic stress**

**A**) Kaplan-Meier curve of overall survival for *Hspa9*<sup>+/+</sup> (*solid line*) and *Hspa9*<sup>+/-</sup> (*dotted line*) mice given weekly doses of 150mg/kg 5-fluorouracil (5-FU) (N=6/genotype, 6-8 months old). **B**) Two doses of 30mg/kg phenylhydrazine (PHZ) was used to induce hemolytic anemia in *Hspa9*<sup>+/+</sup> (*black line*) and *Hspa9*<sup>+/-</sup> (*red line*) mice >11 months old (N=5/genotype). Mice were bled at indicated intervals to monitor for red blood cell recovery (Hematocrit, HCT, *left*; mean corpuscular volume, MCV, *right*). **C**) A single, sublethal dose of radiation (500 rads) was given to 5-6 month old *Hspa9*<sup>+/+</sup> (*black line*) and *Hspa9*<sup>+/-</sup> (*red line*) mice and hematopoietic recovery was monitored by complete blood counts at indicated time intervals (N=5/genotype; white blood cell count, WBC, *left*; hemoglobin, Hb, *right*). fL, femtoliter. Statistical analysis by ANOVA and log-rank test. Error bars represent mean ± SD.

**Figure S6: CFU-PreB colonies from *Hspa9*<sup>+/-</sup> bone marrow are significantly reduced when grown in media supplemented with mouse IL-7**

Bone marrow from 13-19 week old mice was harvested and 100,000 cells were plated in CFU-PreB media containing recombinant mouse IL-7 (R&D systems, HSC009). Colonies were counted on day 7 (p<0.001).

**Figure S7: Retroviral overexpression of HSPA9 rescues the reduction in CFU-PreB colonies in *Hspa9*<sup>+/-</sup> bone marrow**

**A)** Western blot showing overexpression of HSPA9 cDNA in GFP<sup>+</sup> sorted HEK293T cells transduced with MSCV-IRES-GFP control or HSPA9 overexpression vector (MSCV-HSPA9-IRES-GFP). Bone marrow from *Hspa9*<sup>+/+</sup> or *Hspa9*<sup>+/-</sup> mice was transduced with MSCV control (*white bars*) or HSPA9 overexpression (*grey bars*) vectors and harvested 8-10 weeks post-transplant. GFP<sup>+</sup> (**B**) and GFP<sup>-</sup> (**C**) cells from each mouse were sorted and plated in CFU-PreB methylcellulose media. CFU-PreB colonies were counted on day 7. Statistical analysis by two tailed Student's t-test. NS, not significant. Error bars represent mean ± SEM.

**Figure S8: Hardy fractions B-F are significantly reduced in spleens following knockdown of *Hspa9***

**A)** Percent of YFP<sup>+</sup> cells in bone marrow and spleens of mice transduced with control shLUC vector (*filled squares*) or the *Hspa9* knockdown vector, sh*Hspa9* (*open squares*). **B)** Percent of Hardy fractions A-F within the YFP<sup>+</sup> population of the spleen. \*p<0.05, \*\*p<0.01, \*\*\*p<0.001

**Figure S9: *Hspa9*<sup>+/-</sup> B-cells isolated from CFU-PreB culture have an ~50% reduction in *Hspa9* mRNA expression**

Bone marrow from *Hspa9*<sup>+/-</sup> (*open*) or *Hspa9*<sup>+/+</sup> mice (*filled*) was plated in CFU-PreB culture media. **A)** On day 7, colonies were counted and cells were isolated from methylcellulose. **B)** B220<sup>+</sup> cells were sorted by FACS. The RNA isolated from these cells was hybridized to Mouse Gene 1.0 ST arrays (Affymetrix) and analyzed for mRNA expression. **C)** Levels of *Hspa9* mRNA were ~50% reduced in *Hspa9*<sup>+/-</sup> samples compared to *Hspa9*<sup>+/+</sup> samples (N=5/genotype). Statistical analysis by two tailed Student's t-test. Error bars represent mean ± SD.

**Figure S10: B7 cell growth is IL-7 dose-dependent**

B7 cells were grown in media supplemented with varying concentrations of IL-7 (N=2/group).

**Figure S11: Knockdown of *Hspa9* attenuates IL-7 mediated Stat5 activation independent of IL-7 concentration.**

B7 cells were starved of cytokine overnight, spiked with various concentrations of IL-7 to stimulate phosphorylation of Stat5 and collected at times indicated. Stat5 phosphorylation was measured by intracellular flow cytometry. **A)** Representative flow cytometry histogram showing reduced pStat5 levels in *Hspa9* knockdown cells 5 minutes after B7 cells were stimulated with 1ng/mL IL-7 (*Blue*, *Hspa9*-targeting siRNA; *Red*, control siRNA; *Dashed lines*, IL-7 starved cells). **B)** The geometric mean of pStat5 fluorescence is depicted for cells treated with non-targeting control (*red lines*) or *Hspa9*-targeting siRNA (*blue lines*) following 1ng/mL IL-7 stimulation. Representative data is shown for 4 biological replicates. **C)** Independent experiment using two siRNAs with different levels of *Hspa9* knockdown showing cytokine starved B7 cells spiked with IL-7 at a concentration of 10 (*left*), 1 (*middle*) or 0.1ng/mL (*right*) to stimulate phosphorylation of Stat5 and collected at times indicated. Attenuation of Stat5 activation occurs with mild (*green*, siRNA 2) or more severe (*blue*, siRNA 1) knockdown of *Hspa9*, regardless of IL-7 concentration.

## SUPPLEMENTAL FIGURES

Figure S1: Hspa9 expression is reduced using an N-terminal Hspa9 antibody

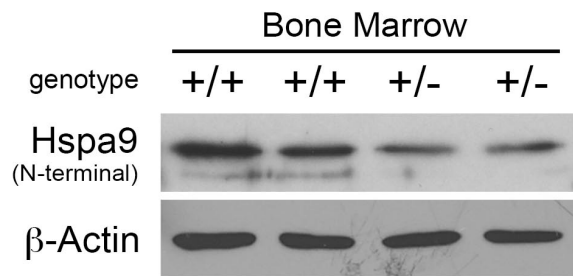

Figure S2: Organ cellularity, spleen size and CBCs are normal in *Hspa9*<sup>+/-</sup> mice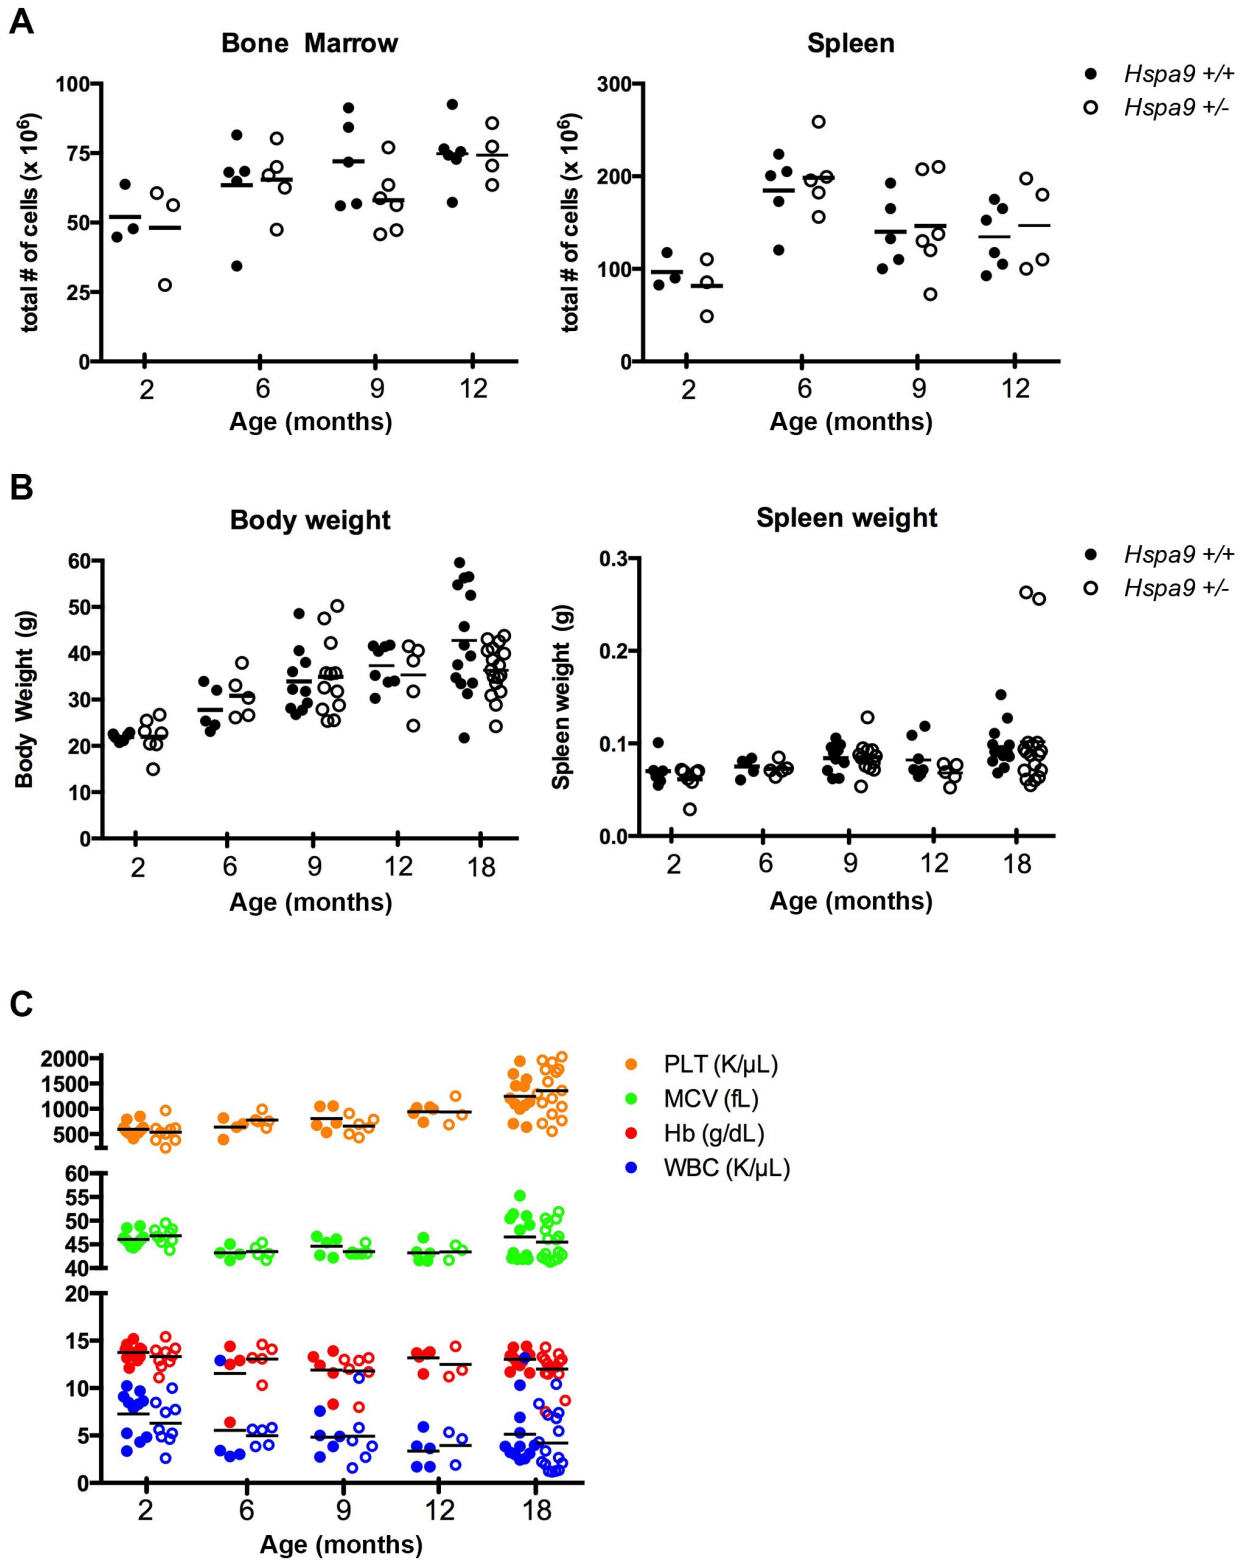



Figure S3: Immunophenotyping of peripheral blood and spleen cells up to 12 months of age

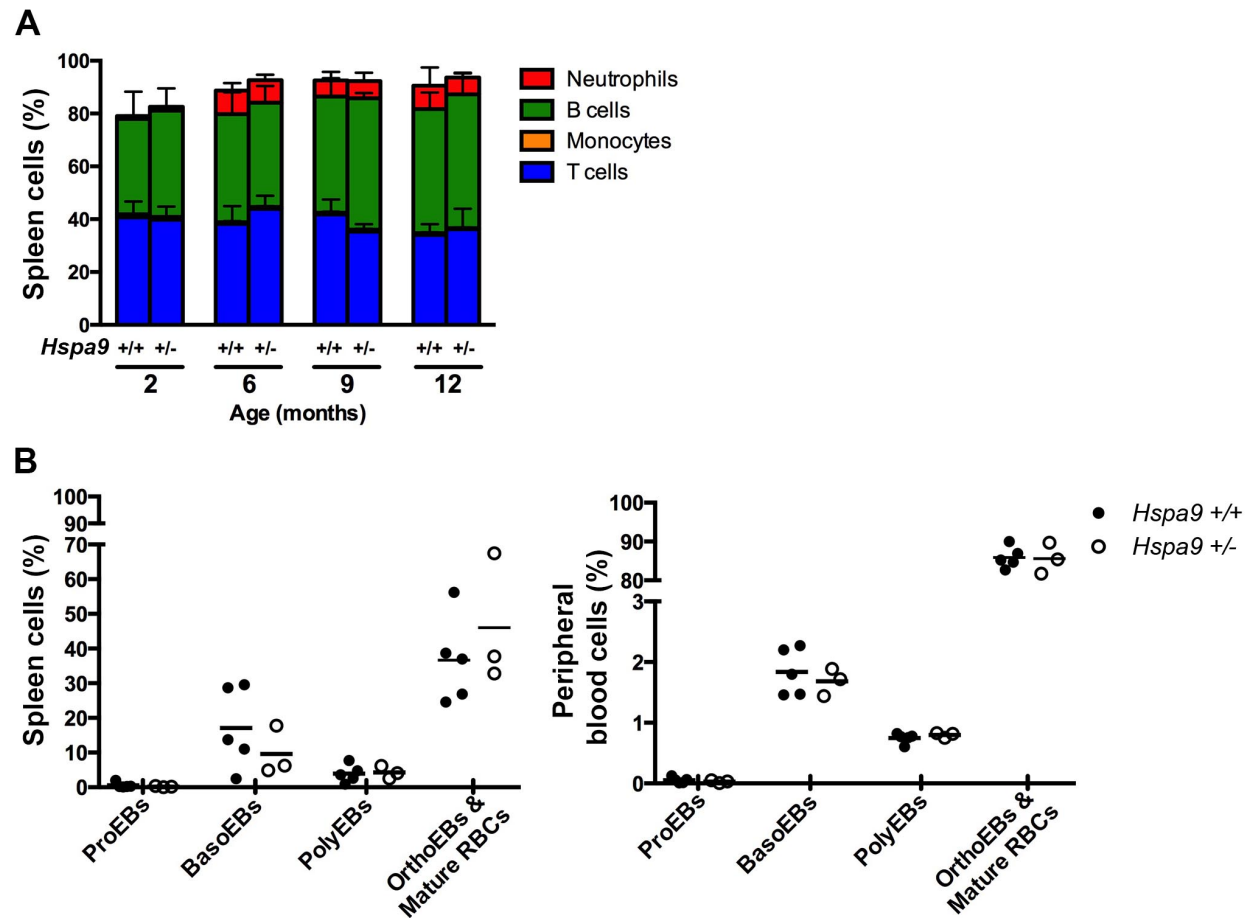

Figure S4: Colony forming ability of erythroid and myeloid spleen and bone marrow progenitors from *Hspa9*<sup>+/-</sup> and *Hspa9*<sup>+/+</sup> mice are similar

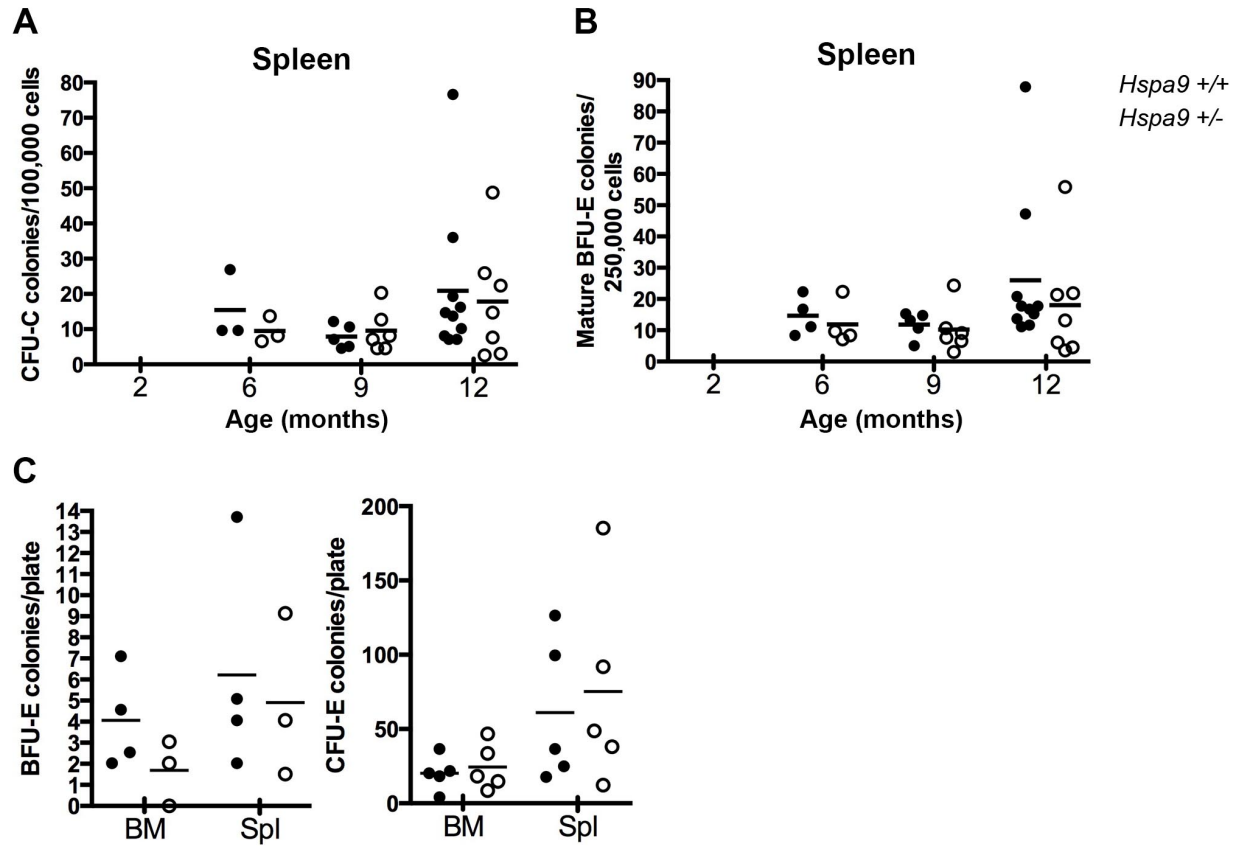

Figure S5: *Hspa9*<sup>-/-</sup> and *Hspa9*<sup>+/-</sup> littermate mice respond similarly to hematopoietic stress

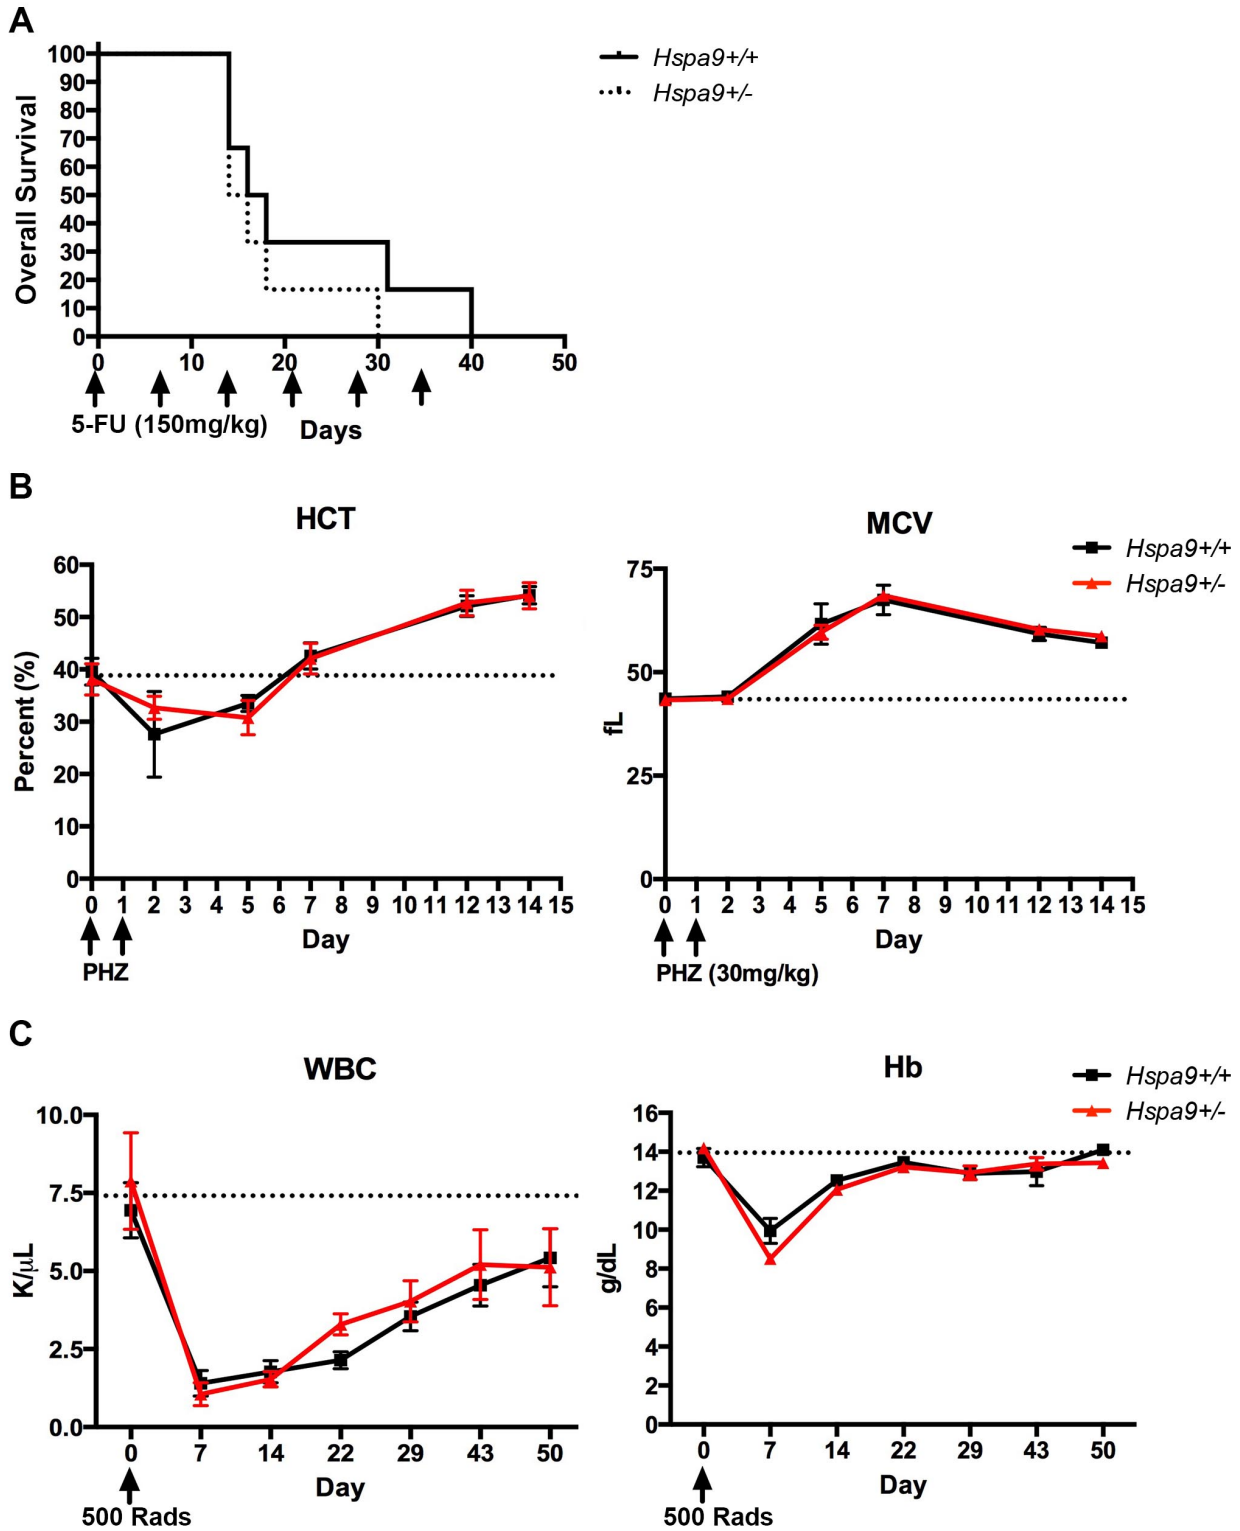

**Figure S6: CFU-PreB colonies from *Hspa9*<sup>+/-</sup> bone marrow are significantly reduced when grown in media supplemented with mouse IL-7**

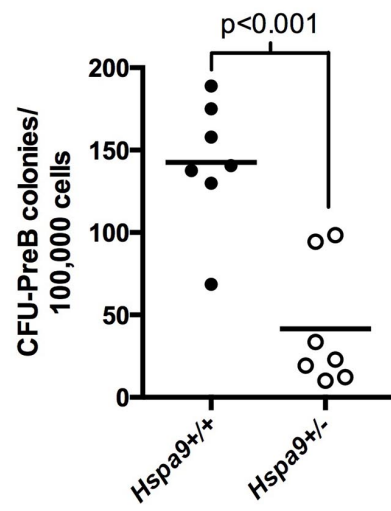

**Figure S7: Retroviral overexpression of HSPA9 rescues the reduction in CFU-PreB colonies in *Hspa9*<sup>+/-</sup> bone marrow**

**A**

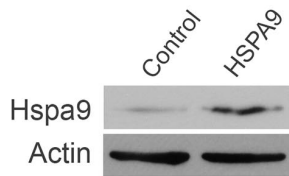

**B**

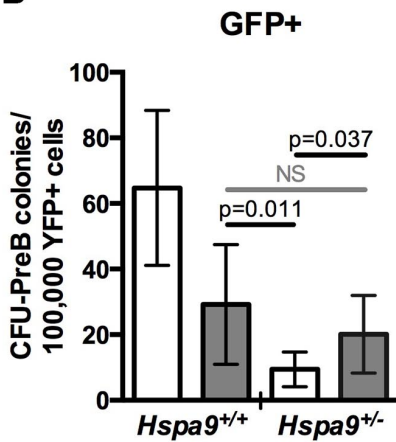

**C**

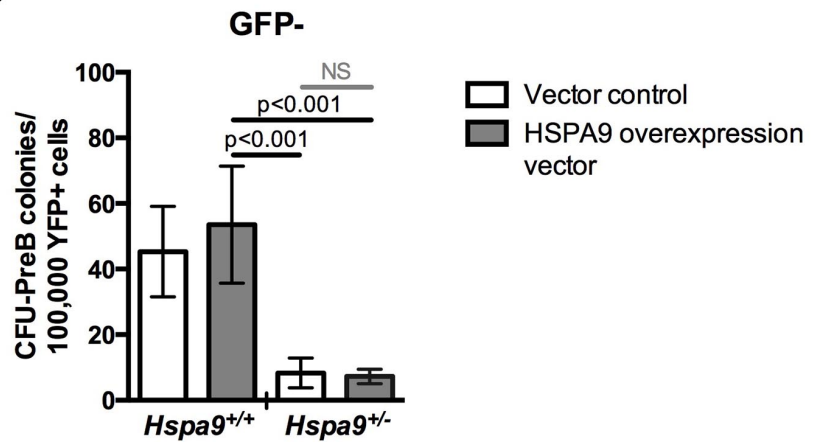

□ Vector control  
 ■ HSPA9 overexpression vector

Figure S8: Hardy fractions B-F are significantly reduced in spleens following knockdown of *Hspa9*

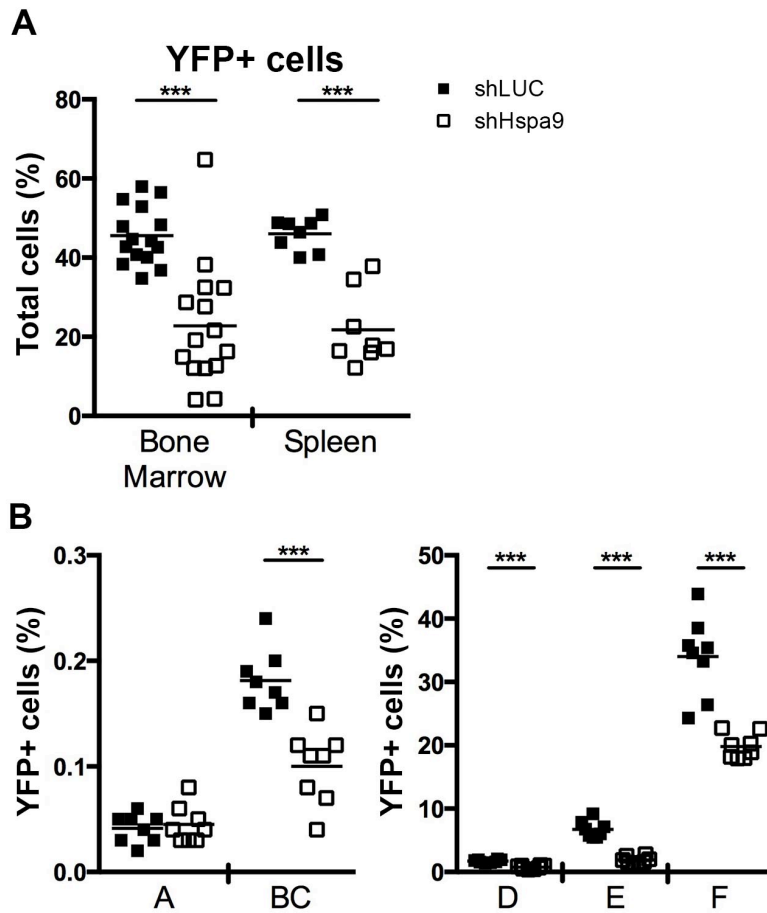

Figure S9: *Hspa9*<sup>+/-</sup> B-cells isolated from CFU-PreB culture have an ~50% reduction in *Hspa9* mRNA expression

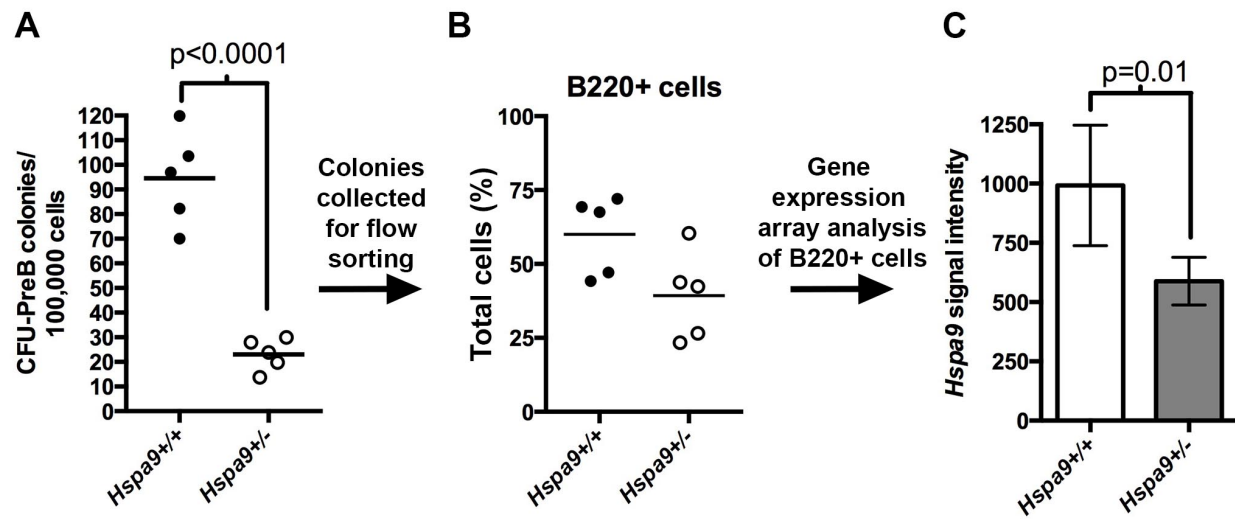

Figure S10: B7 cell growth is IL-7 dose-dependent

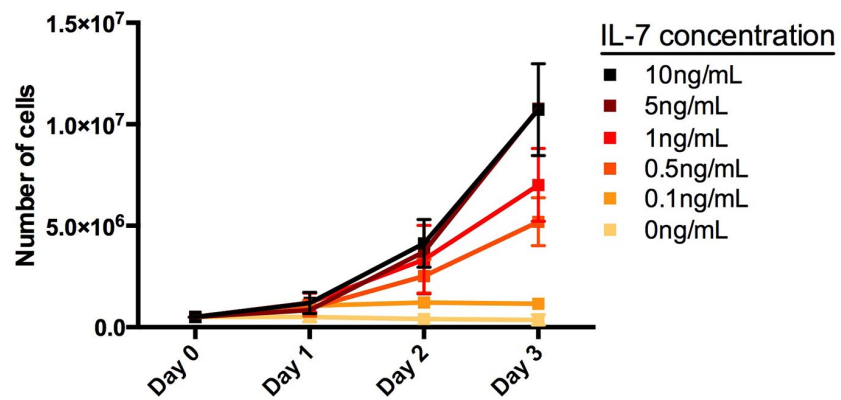



Figure S11: Knockdown of *Hspa9* attenuates IL-7 mediated Stat5 activation independent of IL-7 concentration

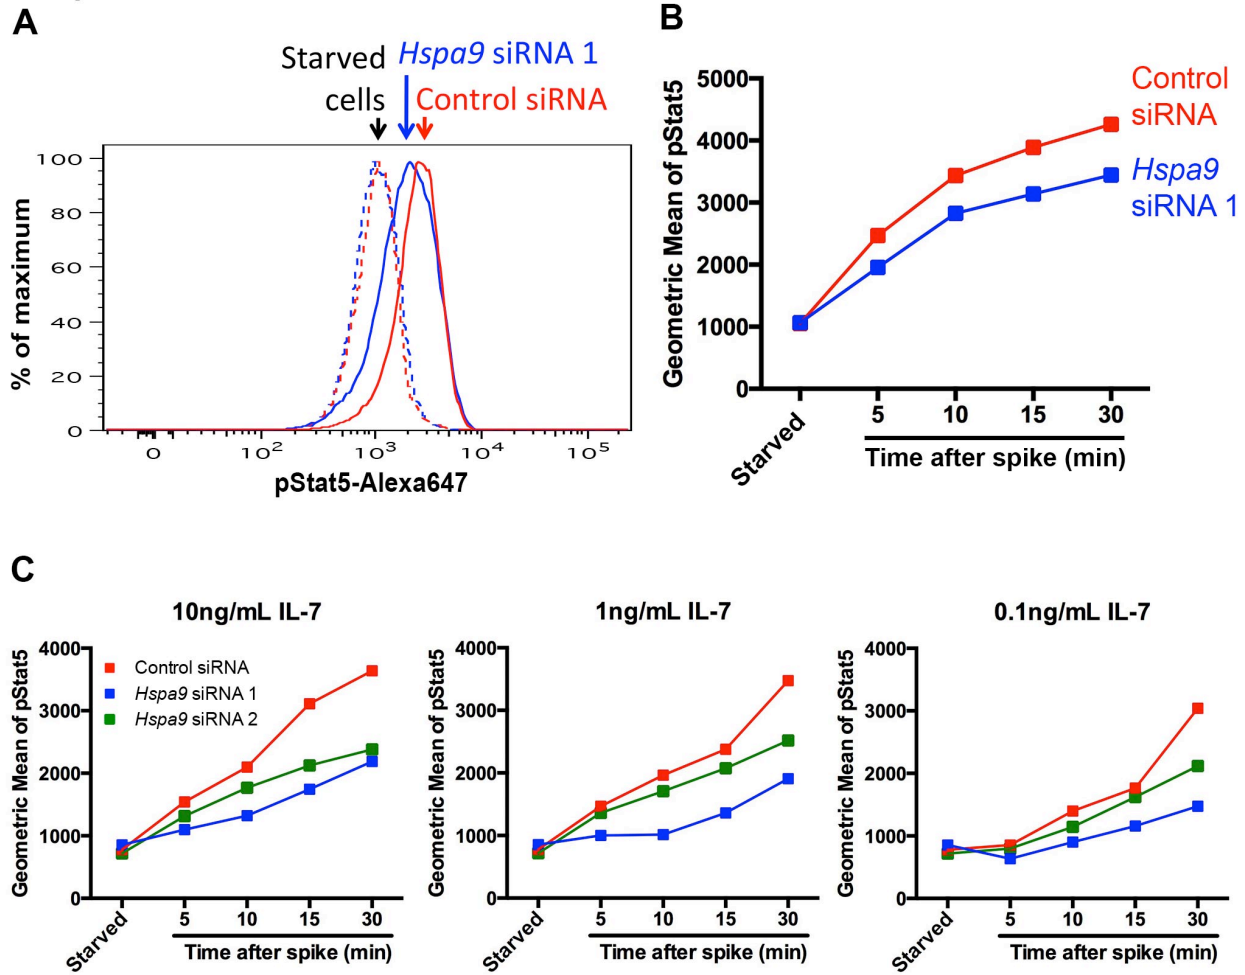

**Table S1: Flow cytometry and Western blot antibodies**

| <b>Antigen</b>     | <b>Clone</b>      | <b>Vendor</b>        |
|--------------------|-------------------|----------------------|
| B220 (CD45R)       | RA3-6B2           | BD/eBioscience       |
| CD115 (c-fms)      | AF598             | eBioscience          |
| CD117 (c-Kit)      | ACK2              | eBioscience          |
| CD11b              | M1/70             | eBioscience          |
| CD11c              | N418              | eBioscience          |
| CD135 (Flt3/Flk2)  | A2F10             | eBioscience          |
| CD150 (SLAM)       | TC15-12F12.2      | Biolegend            |
| CD16/32 (FcGamma)  | 93                | eBioscience          |
| CD19               | 1D3               | BD                   |
| CD27               | LG.7F9            | eBioscience          |
| CD34               | RAM34             | eBioscience          |
| CD3e               | 145-2C11          | BD/eBioscience       |
| CD41               | MWRReg30          | eBioscience          |
| CD43               | S7                | BD                   |
| CD45.1 (Ly5.1)     | A20               | eBioscience          |
| CD45.2 (Ly5.2)     | 104               | BD                   |
| CD48               | HM48-1            | eBioscience          |
| CD71               | YTA74.4           | ABD Serotec          |
| Gr-1 (Ly-6G)       | RB6-8C5           | eBioscience          |
| IgD                | 11-26c            | eBioscience          |
| IgM                | II/41; eB121-15F9 | BD; eBioscience      |
| Igk                | 187.1             | BD                   |
| Igλ                | R26-46            | BD                   |
| IL7Rα              | Not available     | *                    |
| Ly6D               | 49-H4             | BD                   |
| NK1.1              | PK136             | eBioscience          |
| Sca-1 (Ly-6A/E)    | D7                | eBioscience          |
| Stat5 (pY694)      | 47/Stat5pY694     | BD                   |
| Ter119             | TER119            | eBioscience          |
| Actin              | AC-15             | Sigma (A5441)        |
| Hspa9 (C-terminal) | JG-1              | Pierce (MA3-028)     |
| Hspa9 (N-terminal) | polyclonal        | Abcam (Ab23854)      |
| Stat5              | 3H7               | Cell Sig Tech (9358) |
| pStat5             | D47E7             | Cell Sig Tech (4322) |

\*Kindly provided by Deepta Bhattacharya

Table S2: Primers

| Gene                      | Primer/probe | Vendor             | Assay ID      | Assay type                     | Forward primer (5' to 3')       | Reverse primer (5' to 3')        | Context sequence (5' to 3')                                                   | Citation                             |
|---------------------------|--------------|--------------------|---------------|--------------------------------|---------------------------------|----------------------------------|-------------------------------------------------------------------------------|--------------------------------------|
| <i>IL-6</i>               | FAM-MGB      | Applied Biosystems | Mm00446190_m1 | Gene Expression Assay          |                                 |                                  |                                                                               |                                      |
| <i>Fit3-L</i>             | FAM-MGB      | Applied Biosystems | Mm00442801_m1 | Gene Expression Assay          |                                 |                                  |                                                                               |                                      |
| <i>β-Actin</i>            | FAM-MGB      | Applied Biosystems | Mm00607939_s1 | Gene Expression Assay Control  |                                 |                                  |                                                                               |                                      |
| <i>Hspa9</i>              | FAM-MGB      | Applied Biosystems | Mm00477716_g1 | Gene Expression Assay          |                                 |                                  |                                                                               |                                      |
| <i>Gapdh</i>              | FAM-MGB      | Applied Biosystems | Mm99999915_g1 | Gene Expression Assay Control  |                                 |                                  |                                                                               |                                      |
| <i>snoRNA-202</i>         | FAM-NFQ      | Applied Biosystems | 001232        | Control miRNA Assay            |                                 |                                  | GCTGTACTGACTTG<br>ATGAAAGTACTTTT<br>GAAACCCCTTTCCAT<br>CTGATG                 |                                      |
| <i>Gm26109</i>            | FAM-NFQ      | Applied Biosystems | CS5IOYS       | Custom ordered Small RNA Assay |                                 |                                  | GCATTTTATTCAACA<br>CATCATTCTGAAAT<br>AGATGTGTAGAGAA<br>ATGATAAAGCTGAGCA<br>CA |                                      |
| <i>Gm22200</i>            | FAM-NFQ      | Applied Biosystems | CS6RM40       | Custom ordered Small RNA Assay |                                 |                                  | GATGATTTTGTACA<br>TCATTTCTGAAGGAA<br>AGTTTGTGGTGACT<br>TGTATTACTGAGC<br>ACA   |                                      |
| <i>IL-7</i>               | SYBR Green   | Applied Biosystems | ---           | Gene Expression Assay          | TCTGCTGCCTGTC<br>ACATCATC       | GGACATTGAATTC<br>TTCACCTGATATTCA |                                                                               | PNAS 2005 Nov<br>15;102(46):16735-40 |
| <i>Gapdh</i>              | SYBR Green   | Applied Biosystems | ---           | Gene Expression Assay Control  | TGCACCACCAACT<br>GCTTAG         | GATGCAGG<br>GATGATGTTT           |                                                                               | PNAS 2005 Nov<br>15;102(46):16735-40 |
| <i>Hspa9</i>              |              | Sigma              |               | 3 primer genotyping for insert | AGACCACCTGTTCA<br>GATGACCACATGG | TTAGAAAGTCTGGA<br>GCGGTCAATGC    |                                                                               |                                      |
| IST14901H6<br>(insertion) |              | Sigma              |               | 3 primer genotyping for insert | CCAATAAACCCCTC<br>TTGCAGTTGC    |                                  |                                                                               | PNAS 2003 Nov<br>25;100(24):14109-14 |

**Table S3: Genotypes of embryos derived from *Hspa9*<sup>+/-</sup> intercrossed mice**

| <b>Embryonic Day</b>       | <b><i>Hspa9</i><sup>+/+</sup></b> | <b><i>Hspa9</i><sup>+/-</sup></b> | <b><i>Hspa9</i><sup>-/-</sup></b> | <b>total</b> |
|----------------------------|-----------------------------------|-----------------------------------|-----------------------------------|--------------|
| E9.5                       | 2                                 | 5                                 | 0                                 | 7            |
| E11.5                      | 3                                 | 2                                 | 0                                 | 5            |
| E12.5                      | 4                                 | 7                                 | 0                                 | 11           |
| E13                        | 3                                 | 4                                 | 0                                 | 7            |
| E14                        | 3                                 | 2                                 | 0                                 | 5            |
| <b>Observed (Expected)</b> | 15 (8.75)                         | 20 (17.5)                         | 0 (8.75)*                         | 35           |

\*p=0.0011

Table S4: Immunophenotypic markers

| Cell Type              | Cell type by description in text           | Flow cytometric markers                                    |
|------------------------|--------------------------------------------|------------------------------------------------------------|
| B-cell                 | B-cells                                    | B220+                                                      |
|                        | Hardy Fraction A                           | B220+CD3e-CD11c-NK1.1-IgM-IgD-CD19-CD43+LY6D+              |
|                        | Hardy Fraction BC                          | B220+CD3e-CD11c-NK1.1-IgM-IgD-CD19+CD43+                   |
|                        | Hardy Fraction D                           | B220+CD3e-CD11c-NK1.1-IgM-IgD-CD19+CD43-                   |
|                        | Hardy Fraction E                           | B220+CD3e-CD11c-NK1.1-IgM-IgD+                             |
|                        | Hardy Fraction F                           | B220+CD3e-CD11c-NK1.1-IgM+IgD+                             |
| Erythroid              | proerythroblasts                           | Ter119 <sup>med</sup> CD71 <sup>hi</sup>                   |
|                        | polychromatic erythroblasts                | Ter119 <sup>hi</sup> CD71 <sup>hi</sup> FSC <sup>int</sup> |
|                        | basophilic erythroblasts                   | Ter119 <sup>hi</sup> CD71 <sup>hi</sup> FSC <sup>hi</sup>  |
|                        | reticulocytes                              | Ter119 <sup>hi</sup> CD71 <sup>lo</sup> FSC <sup>lo</sup>  |
| T-cell                 | T-cells                                    | CD3e+                                                      |
| Myeloid                | Neutrophils                                | Gr1+CD115-                                                 |
|                        | Monocytes                                  | Gr1+CD115+                                                 |
| Progenitor populations | Common lymphoid progenitor (CLP)           | B220-CD3e-Gr1-Ter119-CD27+Flk2+IL7R $\alpha$ +Ly6D-        |
|                        | Granulocyte-monocyte progenitor (GMP)      | Lin-Sca-cKit+FcyR <sup>hi</sup> CD34+                      |
|                        | Common myeloid progenitor (CMP)            | Lin-Sca-cKit+FcyR <sup>lo</sup> CD34+                      |
|                        | Megakaryocyte-erythrocyte progenitor (MEP) | Lin-Sca-cKit+FcyR <sup>lo</sup> CD34-                      |
| Stem-cell enriched     | KLS                                        | Lin-Sca+cKit+                                              |
|                        | SLAM                                       | Lin-Sca+cKit+CD150+CD48-                                   |
